# Supplementary material for: Comparative Assessment of Age, Growth and Food Habit of the Black-Chinned Tilapia, <em>Sarotherodon melanotheron</em> (R&uuml;ppell, 1852), from Closed and Open Lagoons, Ghana
Source: Preprints.org preprint supplement (doi:10.20944/preprints201902.0106.v1), 2019-02-12
Supplement: Supplementary file 2 [file supplementary]

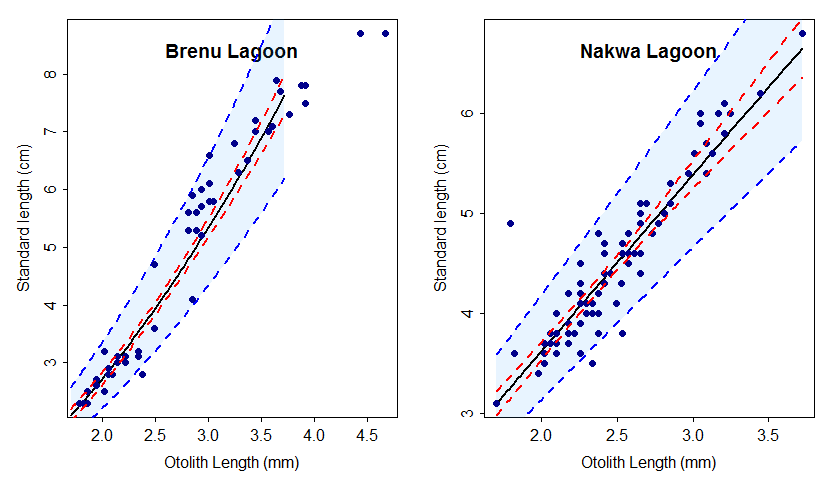


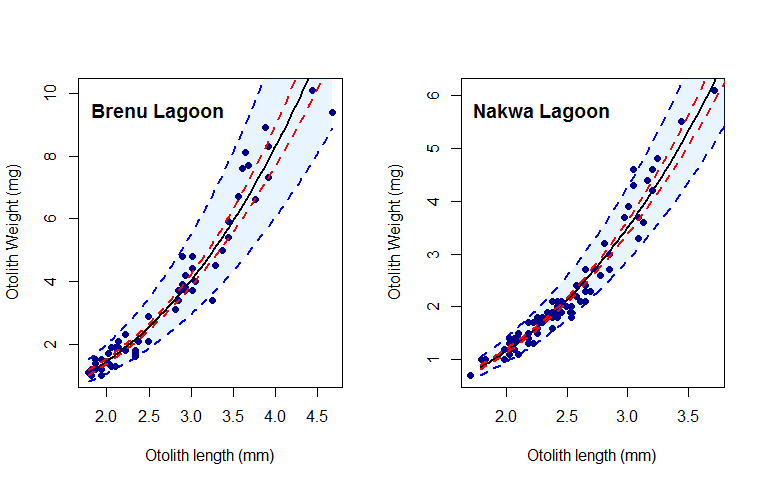


Appendix 1. Relation of (a) otolith length and standard length (b) otolith length and otolith weight of *Sarotherodon**melanotheron* from both Nakwa and Brenu lagoons.
